# Supplementary material for: Pandemic catch-22: The role of mobility restrictions and institutional inequalities in halting the spread of COVID-19
Source: PubMed Central journal article supplement (PMC8238194; doi:10.1371/journal.pone.0253348), 2021-06-28

# **S1 Appendix** to Pandemic Catch-22: The role of mobility restrictions and institutional inequalities in halting the spread of COVID-19

Adnan M. S. Fakir \*

Tushar Bharati †

---

\*Corresponding Author

University of Western Australia Business School, Economics Department, Perth, Australia.  
BRAC University, Economics and Social Sciences, Dhaka, Bangladesh  
email: adnan.fakir@uwa.edu.au; ORCID: 0000-0002-2291-2196

†University of Western Australia Business School, Economics Department, Perth, Australia.  
email: tushar.bharati@uwa.edu.au; ORCID: 0000-0003-4115-9096

**S1 Table: List of Countries**

| #  | Country                | Stringency Index | Cases Growth Rate (7-Day MA) | #   | Country                      | Stringency Index | Cases Growth Rate (7-Day MA) |
|----|------------------------|------------------|------------------------------|-----|------------------------------|------------------|------------------------------|
| 1  | Afghanistan            | 66.18            | 0.10                         | 66  | Luxembourg* $\psi$           | 49.18            | 0.08                         |
| 2  | Angola                 | 78.01            | 0.06                         | 67  | Malaysia* $\psi$             | 56.62            | 0.04                         |
| 3  | Argentina* $\psi$      | 85.41            | 0.10                         | 68  | Mali                         | 60.32            | 0.07                         |
| 4  | Aruba                  | 53.29            | 0.04                         | 69  | Mauritius                    | 59.76            | 0.04                         |
| 5  | Australia* $\psi$      | 56.47            | 0.05                         | 70  | Mexico*                      | 64.70            | 0.09                         |
| 6  | Austria* $\psi$        | 54.49            | 0.07                         | 71  | Moldova                      | 76.82            | 0.09                         |
| 7  | Bahrain* $\psi$        | 67.48            | 0.07                         | 72  | Mongolia                     | 66.54            | 0.05                         |
| 8  | Bangladesh*            | 77.74            | 0.09                         | 73  | Morocco*                     | 77.07            | 0.08                         |
| 9  | Barbados               | 72.62            | 0.05                         | 74  | Mozambique                   | 63.77            | 0.08                         |
| 10 | Belarus* $\psi$        | 11.86            | 0.09                         | 75  | Myanmar*                     | 79.04            | 0.05                         |
| 11 | Belgium* $\psi$        | 57.15            | 0.09                         | 76  | Namibia                      | 61.99            | 0.06                         |
| 12 | Belize                 | 70.88            | 0.04                         | 77  | Nepal* $\psi$                | 77.61            | 0.06                         |
| 13 | Benin                  | 52.21            | 0.07                         | 78  | Netherlands*                 | 58.95            | 0.08                         |
| 14 | Bolivia*               | 89.80            | 0.08                         | 79  | New Zealand* $\psi$          | 48.32            | 0.06                         |
| 15 | Bosnia and Herzegovina | 68.97            | 0.07                         | 80  | Nicaragua                    | 12.06            | 0.08                         |
| 16 | Botswana               | 69.43            | 0.05                         | 81  | Niger                        | 39.38            | 0.07                         |
| 17 | Brazil*                | 69.49            | 0.11                         | 82  | Nigeria* $\psi$              | 67.09            | 0.08                         |
| 18 | Bulgaria* $\psi$       | 54.36            | 0.07                         | 83  | Norway* $\psi$               | 49.80            | 0.07                         |
| 19 | Burkina Faso           | 59.45            | 0.06                         | 84  | Oman                         | 78.16            | 0.08                         |
| 20 | Cambodia               | 41.88            | 0.04                         | 85  | Pakistan* $\psi$             | 72.36            | 0.09                         |
| 21 | Cameroon               | 57.95            | 0.08                         | 86  | Panama*                      | 82.73            | 0.08                         |
| 22 | Canada*                | 58.47            | 0.06                         | 87  | Papua New Guinea             | 58.14            | 0.04                         |
| 23 | Cape Verde             | 76.63            | 0.06                         | 88  | Paraguay* $\psi$             | 83.72            | 0.07                         |
| 24 | Chile* $\psi$          | 70.47            | 0.10                         | 89  | Peru* $\psi$                 | 85.91            | 0.10                         |
| 25 | Colombia* $\psi$       | 80.89            | 0.11                         | 90  | Philippines* $\psi$          | 78.48            | 0.07                         |
| 26 | Costa Rica* $\psi$     | 70.05            | 0.08                         | 91  | Poland* $\psi$               | 61.27            | 0.09                         |
| 27 | Cote d'Ivoire* $\psi$  | 64.77            | 0.09                         | 92  | Portugal* $\psi$             | 69.63            | 0.08                         |
| 28 | Croatia* $\psi$        | 56.25            | 0.06                         | 93  | Puerto Rico                  | 83.36            | 0.05                         |
| 29 | Czech Republic* $\psi$ | 51.85            | 0.07                         | 94  | Qatar* $\psi$                | 75.62            | 0.10                         |
| 30 | Denmark* $\psi$        | 61.47            | 0.08                         | 95  | Romania*                     | 60.96            | 0.08                         |
| 31 | Dominican Republic     | 76.59            | 0.09                         | 96  | Russia* $\psi$               | 65.27            | 0.09                         |
| 32 | Ecuador*               | 80.21            | 0.08                         | 97  | Rwanda* $\psi$               | 72.63            | 0.06                         |
| 33 | Egypt                  | 60.19            | 0.08                         | 98  | Saudi Arabia* $\psi$         | 76.57            | 0.11                         |
| 34 | El Salvador*           | 92.61            | 0.08                         | 99  | Senegal* $\psi$              | 58.47            | 0.07                         |
| 35 | Estonia*               | 45.82            | 0.06                         | 100 | Serbia* $\psi$               | 72.64            | 0.13                         |
| 36 | Fiji* $\psi$           | 75.56            | 0.03                         | 101 | Singapore* $\psi$            | 59.15            | 0.04                         |
| 37 | Finland*               | 42.49            | 0.06                         | 102 | Slovakia* $\psi$             | 59.48            | 0.06                         |
| 38 | France                 | 62.60            | 0.07                         | 103 | Slovenia* $\psi$             | 53.88            | 0.05                         |
| 39 | Gabon                  | 72.61            | 0.08                         | 104 | South Africa* $\psi$         | 75.77            | 0.11                         |
| 40 | Georgia                | 75.56            | 0.08                         | 105 | South Korea* $\psi$          | 55.14            | 0.04                         |
| 41 | Germany* $\psi$        | 53.35            | 0.07                         | 106 | Spain*                       | 59.29            | 0.09                         |
| 42 | Ghana* $\psi$          | 59.83            | 0.09                         | 107 | Sri Lanka                    | 62.81            | 0.05                         |
| 43 | Greece* $\psi$         | 60.61            | 0.06                         | 108 | Sweden                       | 34.62            | 0.08                         |
| 44 | Guatemala              | 94.54            | 0.08                         | 109 | Switzerland*                 | 53.74            | 0.08                         |
| 45 | Haiti                  | 74.17            | 0.08                         | 110 | Taiwan* $\psi$               | 23.90            | 0.02                         |
| 46 | Honduras               | 96.36            | 0.08                         | 111 | Tajikistan                   | 60.97            | 0.10                         |
| 47 | Hungary* $\psi$        | 61.80            | 0.06                         | 112 | Tanzania                     | 37.94            | 0.06                         |
| 48 | India* $\psi$          | 71.40            | 0.09                         | 113 | Thailand* $\psi$             | 54.79            | 0.03                         |
| 49 | Indonesia*             | 62.09            | 0.09                         | 114 | Togo* $\psi$                 | 59.86            | 0.06                         |
| 50 | Iraq                   | 86.47            | 0.08                         | 115 | Trinidad and Tobago          | 73.68            | 0.05                         |
| 51 | Ireland* $\psi$        | 65.42            | 0.09                         | 116 | Turkey* $\psi$               | 67.31            | 0.12                         |
| 52 | Israel* $\psi$         | 70.28            | 0.08                         | 117 | Uganda                       | 85.33            | 0.06                         |
| 53 | Italy* $\psi$          | 68.51            | 0.09                         | 118 | Ukraine* $\psi$              | 68.90            | 0.09                         |
| 54 | Jamaica                | 74.98            | 0.05                         | 119 | United Arab Emirates* $\psi$ | 60.43            | 0.06                         |
| 55 | Japan*                 | 35.36            | 0.04                         | 120 | United Kingdom* $\psi$       | 58.32            | 0.07                         |
| 56 | Jordan                 | 67.87            | 0.07                         | 121 | United States*               | 60.49            | 0.09                         |
| 57 | Kazakhstan* $\psi$     | 81.29            | 0.08                         | 122 | Uruguay*                     | 53.00            | 0.05                         |
| 58 | Kenya* $\psi$          | 86.81            | 0.08                         | 123 | Venezuela                    | 83.12            | 0.06                         |
| 59 | Kuwait* $\psi$         | 80.22            | 0.07                         | 124 | Vietnam* $\psi$              | 62.37            | 0.02                         |
| 60 | Kyrgyzstan             | 82.17            | 0.08                         | 125 | Yemen                        | 54.66            | 0.08                         |
| 61 | Laos                   | 55.92            | 0.02                         | 126 | Zambia                       | 48.44            | 0.07                         |
| 62 | Latvia* $\psi$         | 52.96            | 0.06                         | 127 | Zimbabwe*                    | 79.31            | 0.07                         |
| 63 | Lebanon                | 68.44            | 0.06                         |     |                              |                  |                              |
| 64 | Libya                  | 94.67            | 0.08                         |     |                              |                  |                              |
| 65 | Lithuania* $\psi$      | 58.38            | 0.06                         |     |                              |                  |                              |

Mean of stringency index & cases 7-day moving average growth rate values from 15 Feb to 30 July, 2020.

\* denotes countries with available testing data for a duration of the time frame.

$\psi$  denotes countries who reported to conduct full contact tracing sometime within the time frame.

**S2 Table:** Data Sources

| Variable                          | Data Source                                                                                                        |
|-----------------------------------|--------------------------------------------------------------------------------------------------------------------|
| Stringency Index                  | Oxford Government Response Tracker                                                                                 |
| Retail and Recreation (% change)  | Google Community Mobility Report                                                                                   |
| Grocery and Pharmacy (% change)   | Google Community Mobility Report                                                                                   |
| Parks (% change)                  | Google Community Mobility Report                                                                                   |
| Transit Stations (% change)       | Google Community Mobility Report                                                                                   |
| Workplaces (% change)             | Google Community Mobility Report                                                                                   |
| Residential (% change)            | Google Community Mobility Report                                                                                   |
| Tests (Growth Rate)               | Our World In Data (OWID)                                                                                           |
| Confirmed Cases (Growth Rate)     | Johns Hopkins Center for Systems Science and Engineering (CSSE)                                                    |
| Deaths (Growth Rate)              | Johns Hopkins Center for Systems Science and Engineering (CSSE)                                                    |
| Recoveries (Growth Rate)          | Johns Hopkins Center for Systems Science and Engineering (CSSE)                                                    |
| Population Density                | World Development Indicators (most recent year available)                                                          |
| Primary Education                 | World Development Indicators (most recent year available)                                                          |
| Poverty Headcount (2011 PPP)      | World Development Indicators (most recent year available)                                                          |
| Gini Index                        | World Development Indicators (most recent year available)                                                          |
| Population Aged 65 or older       | World Development Indicators (most recent year available)                                                          |
| PM2.5 (2010-2017 Average)         | World Development Indicators                                                                                       |
| Hospital Beds per 100k Population | OECD, Eurostat, World Bank, National Government Records, and other sources (most recent year available since 2010) |
| Handwashing Facilities            | United Nations Statistics Division (most recent year available)                                                    |
| CVD Death Rate                    | Global Burden of Disease Study 2017 Results                                                                        |
| Democracy Score                   | Economist Intelligence Unit (EIU)                                                                                  |
| Governance Effectiveness          | Worldwide Governance Indicators (WGI)                                                                              |
| Corruption Perception Index       | Transparency International (TI)                                                                                    |

**S3 Table:** Summary statistics by level of development

|                                                                                         | Developing Countries |        |        |        |        | Developed Countries |       |        |        |        |        |         |
|-----------------------------------------------------------------------------------------|----------------------|--------|--------|--------|--------|---------------------|-------|--------|--------|--------|--------|---------|
|                                                                                         | N                    | Mean   | SD     | Median | Min    | Max                 | N     | Mean   | SD     | Median | Min    | Max     |
| <b>Oxford Government Response Tracker</b>                                               |                      |        |        |        |        |                     |       |        |        |        |        |         |
| Stringency Index                                                                        | 6209                 | 65.45  | 24.22  | 70.83  | 0.00   | 100.00              | 12113 | 64.31  | 24.24  | 71.30  | 0.00   | 100.00  |
| <b>Google Mobility Measures</b>                                                         |                      |        |        |        |        |                     |       |        |        |        |        |         |
| Retail and Recreation (% change)                                                        | 6209                 | -29.94 | 24.78  | -25.00 | -94.00 | 35.00               | 12113 | -35.09 | 27.23  | -33.00 | -97.00 | 42.00   |
| Grocery and Pharmacy (% change)                                                         | 6209                 | -15.97 | 22.13  | -13.00 | -95.00 | 94.00               | 12108 | -14.61 | 22.50  | -10.00 | -97.00 | 84.00   |
| Parks (% change)                                                                        | 6208                 | -18.43 | 23.51  | -16.00 | -90.00 | 141.00              | 12113 | -1.72  | 62.64  | -15.00 | -95.00 | 517.00  |
| Transit Stations (% change)                                                             | 6209                 | -34.15 | 23.74  | -32.00 | -92.00 | 39.00               | 12113 | -40.57 | 24.65  | -43.00 | -95.00 | 27.00   |
| Workplaces (% change)                                                                   | 6209                 | -21.24 | 22.25  | -18.00 | -87.00 | 67.00               | 12113 | -30.28 | 22.47  | -29.00 | -92.00 | 80.00   |
| Residential (% change)                                                                  | 6165                 | 12.38  | 9.32   | 11.00  | -16.00 | 49.00               | 12081 | 13.54  | 10.54  | 13.00  | -14.00 | 55.00   |
| <b>Outbreak Variables (Growth Rates of 7-Day Moving Average per million population)</b> |                      |        |        |        |        |                     |       |        |        |        |        |         |
| Tests                                                                                   | 2673                 | 0.05   | 0.06   | 0.03   | 0.00   | 0.97                | 7987  | 0.05   | 0.06   | 0.02   | -0.01  | 0.70    |
| Cases                                                                                   | 6209                 | 0.07   | 0.12   | 0.03   | -0.13  | 1.67                | 12113 | 0.07   | 0.14   | 0.02   | -0.01  | 2.65    |
| Cases to Tests                                                                          | 2673                 | 0.00   | 0.05   | 0.00   | -0.49  | 0.61                | 7987  | 0.01   | 0.06   | -0.01  | -0.34  | 1.53    |
| Deaths                                                                                  | 4714                 | 0.07   | 0.15   | 0.03   | 0.00   | 2.03                | 10555 | 0.07   | 0.18   | 0.02   | -0.01  | 4.01    |
| Deaths to Tests                                                                         | 2305                 | 0.01   | 0.09   | -0.00  | -0.44  | 1.80                | 7371  | 0.02   | 0.11   | -0.00  | -0.24  | 3.24    |
| Days since first case (by Country)                                                      | 6209                 | 72.69  | 43.04  | 71.00  | -76.00 | 188.00              | 12113 | 79.20  | 45.52  | 78.00  | -46.00 | 194.00  |
| <b>Heterogeneity Variables</b>                                                          |                      |        |        |        |        |                     |       |        |        |        |        |         |
| Population Density                                                                      | 6045                 | 157.31 | 210.56 | 82.81  | 1.98   | 1265.04             | 12113 | 269.40 | 931.61 | 88.13  | 3.08   | 7915.73 |
| Primary Education                                                                       | 3236                 | 50.20  | 22.58  | 48.83  | 13.87  | 99.44               | 8321  | 89.90  | 10.50  | 92.70  | 61.80  | 100.00  |
| Poverty Headcount (2011 PPP)                                                            | 5772                 | 23.18  | 20.17  | 18.80  | 0.00   | 62.90               | 10522 | 1.88   | 3.66   | 0.50   | 0.00   | 18.90   |
| Gini Index                                                                              | 5772                 | 39.63  | 7.11   | 40.30  | 25.70  | 57.10               | 10380 | 36.89  | 8.19   | 34.90  | 24.20  | 63.00   |
| Population Aged 65 or older                                                             | 6045                 | 4.60   | 2.58   | 4.03   | 2.17   | 16.46               | 12113 | 12.72  | 6.40   | 13.93  | 1.14   | 27.05   |
| PM2.5 (2010-2017 Average)                                                               | 5520                 | 40.43  | 21.49  | 33.11  | 13.80  | 98.25               | 11699 | 22.50  | 16.23  | 17.81  | 6.46   | 87.02   |
| Corruption Perception Index                                                             | 5919                 | 32.12  | 8.79   | 32.00  | 14.00  | 57.00               | 11454 | 54.83  | 19.32  | 53.00  | 17.00  | 88.00   |
| Democracy Score                                                                         | 5816                 | 4.71   | 1.43   | 4.92   | 1.93   | 7.73                | 11596 | 6.66   | 2.06   | 7.16   | 1.93   | 9.87    |
| Governance Effectiveness                                                                | 6083                 | -0.54  | 0.58   | -0.58  | -2.24  | 1.36                | 12113 | 0.59   | 0.88   | 0.49   | -1.85  | 2.23    |
| Hospital Beds per 100k Population                                                       | 5217                 | 1.64   | 1.93   | 0.90   | 0.10   | 8.80                | 11719 | 3.85   | 2.58   | 2.97   | 0.60   | 13.05   |
| Handwashing Facilities                                                                  | 5363                 | 45.62  | 27.91  | 41.95  | 2.73   | 90.65               | 2669  | 80.31  | 16.99  | 87.85  | 43.99  | 99.00   |
| CVD Death Rate                                                                          | 6209                 | 307.43 | 116.12 | 276.05 | 103.96 | 597.03              | 11976 | 200.22 | 100.04 | 171.29 | 79.37  | 496.22  |

Low- and lower middle-income countries are categorized as developing countries while high- and upper middle-income countries are categorized as developed countries. Low-income economies are defined as those with a GNI per capita, calculated using the World Bank Atlas method, of \$1,025 or less in 2018; lower middle-income economies are those with a GNI per capita between \$1,026 and \$3,995; upper middle-income economies are those with a GNI per capita between \$3,996 and \$12,375; high-income economies are those with a GNI per capita of \$12,376 or more.

**S4 Table:** Mean of 7-day moving average growth rates by testing approach

| <b>Testing Approach</b>  | <b>Tests</b> | <b>Cases</b> | <b>Cases:Tests</b> | <b>Deaths</b> | <b>Deaths:Tests</b> |
|--------------------------|--------------|--------------|--------------------|---------------|---------------------|
| Full Sample              | 0.0467       | 0.0572       | 0.0061             | 0.0610        | 0.0179              |
| Contact Tracing          |              |              |                    |               |                     |
| No Contract Tracing      | 0.0867       | 0.1185       | 0.0196             | 0.1125        | 0.0410              |
| Limited Contract Tracing | 0.0470       | 0.0600       | 0.0083             | 0.0653        | 0.0179              |
| Full Contract Tracing    | 0.0410       | 0.0467       | 0.0029             | 0.0524        | 0.0152              |
| Testing Policy           |              |              |                    |               |                     |
| No Testing Policy        | 0.1185       | 0.1999       | 0.0601             | 0.2562        | 0.1366              |
| Limited Testing          | 0.0670       | 0.0874       | 0.0137             | 0.1003        | 0.0414              |
| Symptom Testing          | 0.0376       | 0.0400       | 0.0005             | 0.0412        | 0.0036              |
| Open Testing             | 0.0279       | 0.0283       | 0.0003             | 0.0326        | 0.0038              |
| Testing Report           |              |              |                    |               |                     |
| People Tested            | 0.0449       | 0.0571       | 0.0091             | 0.0576        | 0.0148              |
| Total Tests              | 0.0476       | 0.0585       | 0.0055             | 0.0621        | 0.0195              |

Using available data from 15 Feb to 30 July, 2020. Each row within each panel represents the corresponding restricted sample. *Limited contact tracing* is when tracing is not done for all cases; *Full contact tracing* is when tracing is done for all identified cases; *Limited testing policy* tests only those who both (a) have symptoms AND (b) meet specific criteria (eg. key workers, admitted to hospital, came into contact with a known case, returned from overseas); *Symptom testing policy* tests anyone showing Covid-19 symptoms; *Open testing policy* is when testing is open to all public (eg. "drive through" testing available to asymptomatic people); *People tested* refers to testing data where the number of people tested (excluding follow-up or repeated tests of the same person) are reported; *Totals tests* is when only the total number of tests conducted is reported, regardless of double counting.

**S5 Table: Impact on mobility using alternative instruments**

| VARIABLES                             | (1)<br>Retail<br>Recreation    | (2)<br>Grocery<br>Pharmacy | (3)<br>Parks       | (4)<br>Transit Stations | (5)<br>Workplaces  | (6)<br>Residential |
|---------------------------------------|--------------------------------|----------------------------|--------------------|-------------------------|--------------------|--------------------|
| 2SLS: World excluding Country IV      |                                |                            |                    |                         |                    |                    |
| Stringency Index (Lag 0)              | -1.12***<br>(0.05)             | -0.69***<br>(0.04)         | -0.63***<br>(0.09) | -1.05***<br>(0.04)      | -0.92***<br>(0.04) | 0.38***<br>(0.02)  |
| Mean of DV                            | -33.34                         | -15.07                     | -7.38              | -38.39                  | -27.22             | 13.14              |
| F-Stat                                | 289.42                         | 289.37                     | 289.43             | 289.42                  | 289.42             | 289.19             |
| Stringency Index (Lag 14)             | -0.67***<br>(0.04)             | -0.47***<br>(0.03)         | -0.29***<br>(0.09) | -0.62***<br>(0.04)      | -0.56***<br>(0.04) | 0.24***<br>(0.02)  |
| Mean of DV                            | -34.17                         | -15.50                     | -7.73              | -39.31                  | -27.88             | 13.45              |
| F-Stat                                | 318.47                         | 318.32                     | 318.48             | 318.47                  | 318.47             | 317.12             |
| 2SLS: Region excluding Country IV     |                                |                            |                    |                         |                    |                    |
| Stringency Index (Lag 0)              | -1.13***<br>(0.05)             | -0.62***<br>(0.04)         | -0.96***<br>(0.11) | -1.03***<br>(0.04)      | -0.83***<br>(0.04) | 0.38***<br>(0.02)  |
| Mean of DV                            | -33.34                         | -15.07                     | -7.38              | -38.39                  | -27.22             | 13.14              |
| F-Stat                                | 304.39                         | 304.21                     | 304.39             | 304.39                  | 304.39             | 303.18             |
| Stringency Index (Lag 14)             | -0.65***<br>(0.05)             | -0.42***<br>(0.04)         | -0.49***<br>(0.08) | -0.58***<br>(0.05)      | -0.48***<br>(0.04) | 0.22***<br>(0.02)  |
| Mean of DV                            | -34.17                         | -15.50                     | -7.73              | -39.31                  | -27.88             | 13.45              |
| F-Stat                                | 312.02                         | 311.85                     | 312.01             | 312.02                  | 312.02             | 310.14             |
| 2SLS: World excluding Region IV       |                                |                            |                    |                         |                    |                    |
| Stringency Index (Lag 0)              | -1.11***<br>(0.05)             | -0.71***<br>(0.04)         | -0.56***<br>(0.10) | -1.05***<br>(0.04)      | -0.94***<br>(0.04) | 0.38***<br>(0.02)  |
| Mean of DV                            | -33.34                         | -15.07                     | -7.38              | -38.39                  | -27.22             | 13.14              |
| F-Stat                                | 245.36                         | 245.32                     | 245.37             | 245.36                  | 245.36             | 245.03             |
| Stringency Index (Lag 14)             | -0.67***<br>(0.05)             | -0.48***<br>(0.04)         | -0.25***<br>(0.09) | -0.63***<br>(0.04)      | -0.58***<br>(0.04) | 0.24***<br>(0.02)  |
| Mean of DV                            | -34.17                         | -15.50                     | -7.73              | -39.31                  | -27.88             | 13.45              |
| F-Stat                                | 267.70                         | 267.59                     | 267.71             | 267.70                  | 267.70             | 266.40             |
| 2SLS: Sub-region excluding Country IV |                                |                            |                    |                         |                    |                    |
| Stringency Index (Lag 0)              | -1.11***<br>(0.05)             | -0.66***<br>(0.04)         | -1.00***<br>(0.10) | -1.01***<br>(0.04)      | -0.83***<br>(0.04) | 0.39***<br>(0.02)  |
| Mean of DV                            | -33.34                         | -15.07                     | -7.38              | -38.39                  | -27.22             | 13.14              |
| F-Stat                                | 237.41                         | 237.39                     | 237.41             | 237.41                  | 237.41             | 237.66             |
| Stringency Index (Lag 14)             | -0.72***<br>(0.05)             | -0.48***<br>(0.04)         | -0.74***<br>(0.09) | -0.64***<br>(0.05)      | -0.52***<br>(0.05) | 0.26***<br>(0.02)  |
| Mean of DV                            | -34.17                         | -15.50                     | -7.73              | -39.31                  | -27.88             | 13.45              |
| F-Stat                                | 234.29                         | 234.35                     | 234.29             | 234.29                  | 234.29             | 233.84             |
| Observations (Lag 0)                  | 18,324                         | 18,319                     | 18,323             | 18,324                  | 18,324             | 18,248             |
| Observations (Lag 14)                 | 17,852                         | 17,847                     | 17,851             | 17,852                  | 17,852             | 17,776             |
| Number of country                     | 127                            | 127                        | 127                | 127                     | 127                | 127                |
| Fixed Effects                         | Country; Days since first case |                            |                    |                         |                    |                    |

Robust standard errors clustered at the country level.

\*  $p < 0.10$ ; \*\*  $p < 0.05$ ; \*\*\*  $p < 0.01$ .

**S6 Table: Impact on growth rates using alternative instruments**

| VARIABLES                             | (1)<br>Tests                   | (2)<br>Cases           | (3)<br>Cases:Tests     | (4)<br>Deaths          | (5)<br>Deaths:Tests    |
|---------------------------------------|--------------------------------|------------------------|------------------------|------------------------|------------------------|
| 2SLS: World excluding Country IV      |                                |                        |                        |                        |                        |
| Stringency Index (Lag 0)              | -0.0007**<br>(0.0003)          | -0.0015***<br>(0.0003) | -0.0010**<br>(0.0005)  | -0.0059***<br>(0.0013) | -0.0049***<br>(0.0018) |
| Mean of DV                            | 0.047                          | 0.071                  | 0.006                  | 0.070                  | 0.018                  |
| F-Stat                                | 46.409                         | 289.425                | 46.409                 | 70.597                 | 32.534                 |
| Stringency Index (Lag 14)             | -0.0008***<br>(0.0002)         | -0.0023***<br>(0.0002) | -0.0010***<br>(0.0002) | -0.0046***<br>(0.0005) | -0.0031***<br>(0.0006) |
| Mean of DV                            | 0.046                          | 0.069                  | 0.006                  | 0.069                  | 0.017                  |
| F-Stat                                | 86.301                         | 318.467                | 86.301                 | 202.627                | 59.742                 |
| 2SLS: Region excluding Country IV     |                                |                        |                        |                        |                        |
| Stringency Index (Lag 0)              | -0.0005**<br>(0.0002)          | -0.0015***<br>(0.0003) | -0.0008**<br>(0.0003)  | -0.0044***<br>(0.0010) | -0.0015<br>(0.0010)    |
| Mean of DV                            | 0.047                          | 0.071                  | 0.006                  | 0.070                  | 0.018                  |
| F-Stat                                | 60.606                         | 304.391                | 60.606                 | 114.018                | 37.607                 |
| Stringency Index (Lag 14)             | -0.0009***<br>(0.0002)         | -0.0024***<br>(0.0002) | -0.0010***<br>(0.0002) | -0.0041***<br>(0.0004) | -0.0025***<br>(0.0006) |
| Mean of DV                            | 0.046                          | 0.069                  | 0.006                  | 0.069                  | 0.017                  |
| F-Stat                                | 96.588                         | 312.025                | 96.588                 | 293.061                | 94.064                 |
| 2SLS: World excluding Region IV       |                                |                        |                        |                        |                        |
| Stringency Index (Lag 0)              | -0.0007**<br>(0.0003)          | -0.0015***<br>(0.0003) | -0.0011**<br>(0.0005)  | -0.0063***<br>(0.0014) | -0.0059**<br>(0.0023)  |
| Mean of DV                            | 0.047                          | 0.071                  | 0.006                  | 0.070                  | 0.018                  |
| F-Stat                                | 38.694                         | 245.362                | 38.694                 | 59.111                 | 26.549                 |
| Stringency Index (Lag 14)             | -0.0008***<br>(0.0002)         | -0.0022***<br>(0.0002) | -0.0011***<br>(0.0002) | -0.0047***<br>(0.0005) | -0.0033***<br>(0.0006) |
| Mean of DV                            | 0.046                          | 0.069                  | 0.006                  | 0.069                  | 0.017                  |
| F-Stat                                | 72.765                         | 267.696                | 72.765                 | 165.143                | 49.611                 |
| 2SLS: Sub-region excluding Country IV |                                |                        |                        |                        |                        |
| Stringency Index (Lag 0)              | -0.0003<br>(0.0002)            | -0.0009***<br>(0.0003) | -0.0004<br>(0.0004)    | -0.0042***<br>(0.0010) | -0.0024**<br>(0.0010)  |
| Mean of DV                            | 0.047                          | 0.071                  | 0.006                  | 0.070                  | 0.018                  |
| F-Stat                                | 86.176                         | 237.407                | 86.176                 | 93.581                 | 36.018                 |
| Stringency Index (Lag 14)             | -0.0006***<br>(0.0002)         | -0.0017***<br>(0.0003) | -0.0005**<br>(0.0002)  | -0.0041***<br>(0.0005) | -0.0024***<br>(0.0005) |
| Mean of DV                            | 0.046                          | 0.069                  | 0.006                  | 0.069                  | 0.017                  |
| F-Stat                                | 97.907                         | 234.292                | 97.907                 | 176.617                | 77.756                 |
| Observations (Lag 0)                  | 10,662                         | 18,324                 | 10,662                 | 15,270                 | 9,678                  |
| Observations (Lag 14)                 | 10,539                         | 17,852                 | 10,539                 | 15,151                 | 9,625                  |
| Number of country                     | 80                             | 127                    | 80                     | 121                    | 78                     |
| Fixed Effects                         | Country; Days since first case |                        |                        |                        |                        |

Robust standard errors clustered at the country level.

\*  $p < 0.10$ ; \*\*  $p < 0.05$ ; \*\*\*  $p < 0.01$ .

**S7 Table: Impact on 7-day moving average growth rates by testing approach**

| VARIABLES                      | (1)<br>Full<br>Sample  | (2)<br>No<br>Testing<br>Policy | (3)<br>Limited<br>Testing | (4)<br>Symptom<br>Testing | (5)<br>Open<br>Testing | (6)<br>No<br>Contact<br>Tracing | (7)<br>Limited<br>Contact<br>Tracing | (8)<br>Full<br>Contact<br>Tracing | (9)<br>People<br>Tested | (10)<br>Total<br>Tests |
|--------------------------------|------------------------|--------------------------------|---------------------------|---------------------------|------------------------|---------------------------------|--------------------------------------|-----------------------------------|-------------------------|------------------------|
| Tests                          |                        |                                |                           |                           |                        |                                 |                                      |                                   |                         |                        |
| Stringency Index<br>(Lag 14)   | -0.0009***<br>(0.0002) | -0.0002<br>(0.0013)            | -0.0005<br>(0.0004)       | -0.0015***<br>(0.0005)    | -0.0018***<br>(0.0006) | -0.0009<br>(0.0007)             | -0.0014***<br>(0.0003)               | -0.0005**<br>(0.0003)             | -0.0007***<br>(0.0002)  | -0.0008***<br>(0.0003) |
| Observations                   | 10,539                 | 263                            | 3,527                     | 3,664                     | 2,866                  | 933                             | 3,572                                | 5,815                             | 2,832                   | 6,198                  |
| Number of country              | 80                     | 12                             | 53                        | 51                        | 34                     | 20                              | 40                                   | 59                                | 21                      | 48                     |
| Mean of DV                     | 0.046                  | 0.118                          | 0.066                     | 0.037                     | 0.027                  | 0.086                           | 0.047                                | 0.040                             | 0.044                   | 0.047                  |
| F-Stat                         | 78.483                 | 3.652                          | 32.985                    | 26.782                    | 8.532                  | 34.097                          | 45.983                               | 35.720                            | 13.042                  | 59.329                 |
| Cases: Tests                   |                        |                                |                           |                           |                        |                                 |                                      |                                   |                         |                        |
| Stringency Index<br>(Lag 14)   | -0.0011***<br>(0.0002) | 0.0007<br>(0.0008)             | -0.0010**<br>(0.0004)     | -0.0014***<br>(0.0004)    | -0.0010***<br>(0.0003) | -0.0016***<br>(0.0003)          | -0.0011***<br>(0.0002)               | -0.0009***<br>(0.0003)            | -0.0012***<br>(0.0003)  | -0.0011***<br>(0.0004) |
| Observations                   | 10,539                 | 263                            | 3,527                     | 3,664                     | 2,866                  | 933                             | 3,572                                | 5,815                             | 2,832                   | 6,198                  |
| Number of country              | 80                     | 12                             | 53                        | 51                        | 34                     | 20                              | 40                                   | 59                                | 21                      | 48                     |
| Mean of DV                     | 0.006                  | 0.069                          | 0.014                     | -0.001                    | -0.000                 | 0.019                           | 0.008                                | 0.003                             | 0.009                   | 0.005                  |
| F-Stat                         | 78.483                 | 3.652                          | 32.985                    | 26.782                    | 8.532                  | 34.097                          | 45.983                               | 35.720                            | 13.042                  | 59.329                 |
| Deaths: Tests                  |                        |                                |                           |                           |                        |                                 |                                      |                                   |                         |                        |
| Stringency Index<br>(Lag 14)   | -0.0032***<br>(0.0006) | -0.0238<br>(0.0152)            | -0.0032***<br>(0.0009)    | -0.0028***<br>(0.0009)    | -0.0016***<br>(0.0004) | -0.0022<br>(0.0019)             | -0.0025***<br>(0.0007)               | -0.0030***<br>(0.0008)            | -0.0015**<br>(0.0006)   | -0.0046***<br>(0.0009) |
| Observations                   | 9,625                  | 159                            | 3,080                     | 3,563                     | 2,612                  | 768                             | 3,451                                | 5,196                             | 2,709                   | 5,639                  |
| Number of country              | 78                     | 7                              | 53                        | 49                        | 32                     | 16                              | 40                                   | 57                                | 21                      | 47                     |
| Mean of DV                     | 0.017                  | 0.137                          | 0.041                     | 0.004                     | 0.002                  | 0.041                           | 0.018                                | 0.014                             | 0.013                   | 0.019                  |
| F-Stat                         | 55.454                 | 1.404                          | 24.276                    | 24.206                    | 6.919                  | 27.599                          | 37.831                               | 21.820                            | 11.925                  | 45.380                 |
| Fixed Effects                  |                        |                                |                           |                           |                        |                                 |                                      |                                   |                         |                        |
| Country; Days since first case |                        |                                |                           |                           |                        |                                 |                                      |                                   |                         |                        |

Robust standard errors clustered at the country level.

\*  $p < 0.10$ ; \*\*  $p < 0.05$ ; \*\*\*  $p < 0.01$ .



**S8 Table: Heterogenous impact of transit station mobility on growth rates: Recursive mixed-process model (Full contract tracing sample)**

| VARIABLES        | (1)                                | (2)                      | (3)                     | (4)                      | (5)                     | (6)                      | (7)                     | (8)                      |
|------------------|------------------------------------|--------------------------|-------------------------|--------------------------|-------------------------|--------------------------|-------------------------|--------------------------|
|                  | Cases:Tests<br>< Median            | Deaths:Tests<br>> Median | Cases:Tests<br>> Median | Deaths:Tests<br>> Median | Cases:Tests<br>< Median | Deaths:Tests<br>< Median | Cases:Tests<br>> Median | Deaths:Tests<br>> Median |
|                  | Corruption Perception Index        |                          |                         |                          |                         |                          |                         |                          |
| Transit Stations | 0.0029**<br>(0.0011)               | 0.0111**<br>(0.0032)     | 0.0010<br>(0.0015)      | 0.0039***<br>(0.0014)    | -0.0003<br>(0.0012)     | 0.0038<br>(0.0043)       | 0.0015<br>(0.0011)      | 0.0041***<br>(0.0015)    |
| Observations     | 3,807                              | 5,246                    | 5,246                   | 5,203                    | 3,149                   | 3,135                    | 5,904                   | 5,875                    |
| Mean of DV       | 0.007                              | 0.016                    | 0.002                   | 0.015                    | 0.009                   | 0.015                    | 0.001                   | 0.015                    |
|                  | Democracy Score                    |                          |                         |                          |                         |                          |                         |                          |
| Transit Stations | -0.0004<br>(0.0011)                | 0.0019**<br>(0.0008)     | 0.0012<br>(0.0010)      | 0.0053***<br>(0.0014)    | -0.0003<br>(0.0007)     | 0.0060***<br>(0.0025)    | 0.0025***<br>(0.0009)   | 0.0064***<br>(0.0021)    |
| Observations     | 2,207                              | 2,193                    | 2,193                   | 6,846                    | 3,970                   | 3,942                    | 5,083                   | 5,068                    |
| Mean of DV       | 0.003                              | 0.015                    | 0.003                   | 0.015                    | 0.006                   | 0.020                    | 0.001                   | 0.013                    |
|                  | Government Effectiveness           |                          |                         |                          |                         |                          |                         |                          |
| Transit Stations | 0.0026<br>(0.0024)                 | 0.0057***<br>(0.0016)    | -0.0001<br>(0.0007)     | 0.0020<br>(0.0013)       | -0.0002<br>(0.0013)     | 0.0037**<br>(0.0017)     | 0.0012<br>(0.0011)      | 0.0076***<br>(0.0027)    |
| Observations     | 4,283                              | 4,254                    | 4,254                   | 4,770                    | 3,764                   | 5,275                    | 5,275                   | 5,246                    |
| Mean of DV       | 0.001                              | 0.015                    | 0.005                   | 0.015                    | 0.007                   | 0.013                    | 0.001                   | 0.016                    |
|                  | Hospital Beds per 100k             |                          |                         |                          |                         |                          |                         |                          |
| Transit Stations | 0.0017***<br>(0.0005)              | 0.0048***<br>(0.0021)    | 0.0015<br>(0.0012)      | 0.0042***<br>(0.0016)    | -0.0000<br>(0.0005)     | 0.0044***<br>(0.0014)    | 0.0024***<br>(0.0008)   | 0.0057***<br>(0.0018)    |
| Observations     | 3,843                              | 3,811                    | 5,210                   | 5,199                    | 3,425                   | 3,386                    | 5,628                   | 5,624                    |
| Mean of DV       | 0.001                              | 0.017                    | 0.005                   | 0.014                    | 0.004                   | 0.013                    | 0.002                   | 0.016                    |
|                  | Handwashing Facilities             |                          |                         |                          |                         |                          |                         |                          |
| Transit Stations | -0.0000<br>(0.0005)                | 0.0046***<br>(0.0012)    | 0.0025***<br>(0.0009)   | 0.0047***<br>(0.0021)    | -0.0003<br>(0.0006)     | 0.0032**<br>(0.0016)     | 0.0012**<br>(0.0010)    | 0.0046***<br>(0.0013)    |
| Observations     | 4,240                              | 4,201                    | 4,201                   | 4,813                    | 1,976                   | 1,962                    | 7,077                   | 7,048                    |
| Mean of DV       | 0.006                              | 0.019                    | 0.001                   | 0.013                    | 0.008                   | 0.021                    | 0.002                   | 0.014                    |
|                  | Cardiovascular Diseases Death Rate |                          |                         |                          |                         |                          |                         |                          |
| Transit Stations | 0.0023***<br>(0.0006)              | 0.0047***<br>(0.0016)    | -0.0006<br>(0.0008)     | 0.0057***<br>(0.0022)    | 0.0028***<br>(0.0014)   | 0.0068***<br>(0.0021)    | -0.0000<br>(0.0007)     | 0.0038<br>(0.0032)       |
| Observations     | 4,056                              | 4,045                    | 4,045                   | 4,997                    | 4,112                   | 4,108                    | 4,941                   | 4,902                    |
| Mean of DV       | 0.001                              | 0.014                    | 0.005                   | 0.016                    | 0.002                   | 0.014                    | 0.004                   | 0.016                    |
| Fixed Effects    | Country; Days since first case     |                          |                         |                          |                         |                          |                         |                          |

Robust standard errors clustered at the country level.

\*  $p < 0.10$ ; \*\*  $p < 0.05$ ; \*\*\*  $p < 0.01$ .

**S1 Figure:** Event graph of OxCGRT Stringency Index by country over time

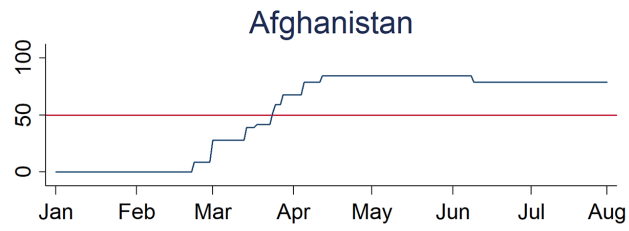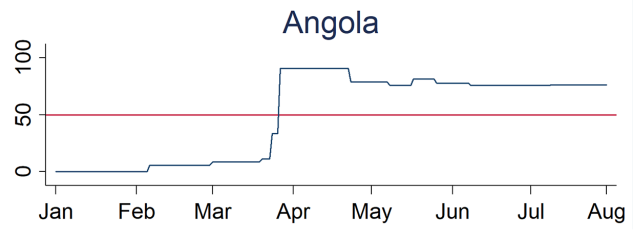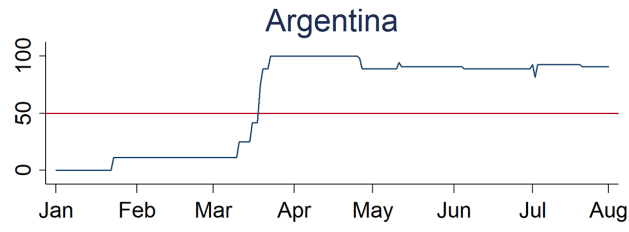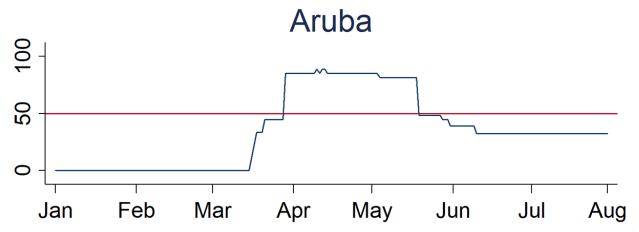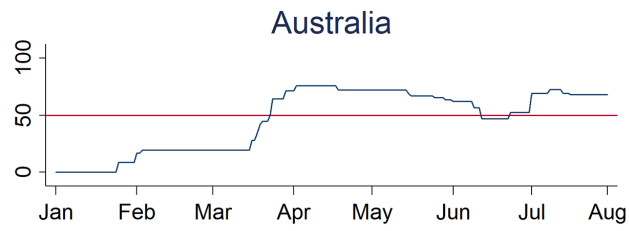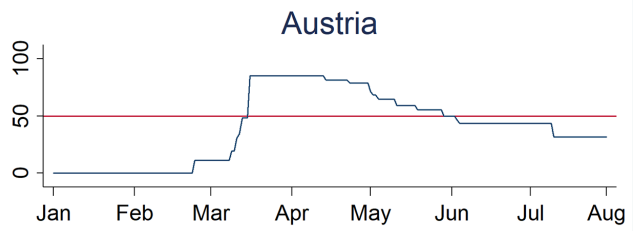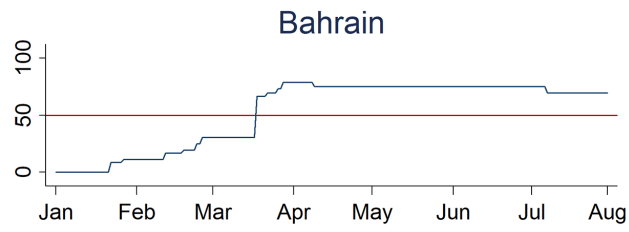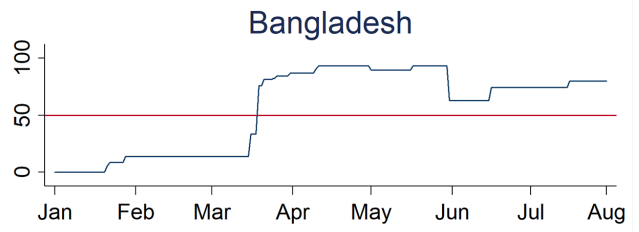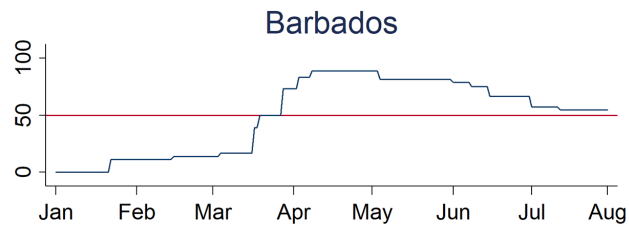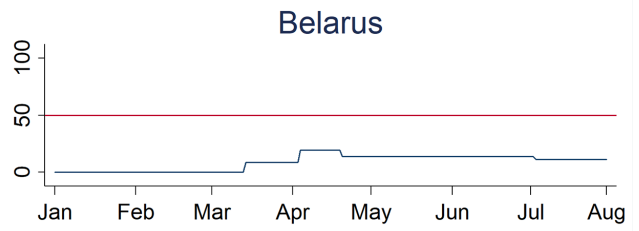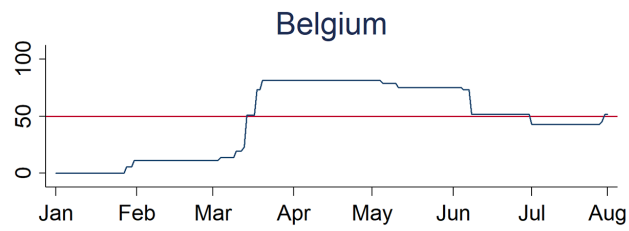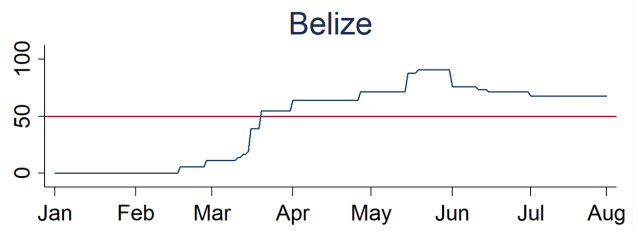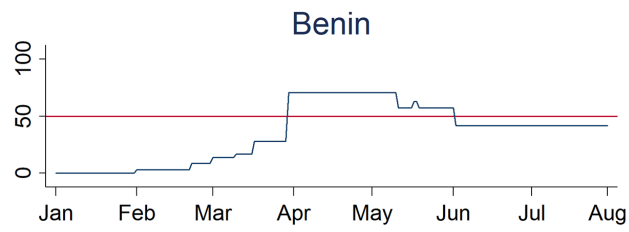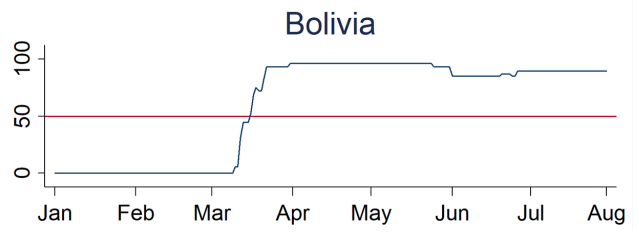

**S2 Figure:** Event graph of OxCGR T Stringency Index by country over time (cont.)

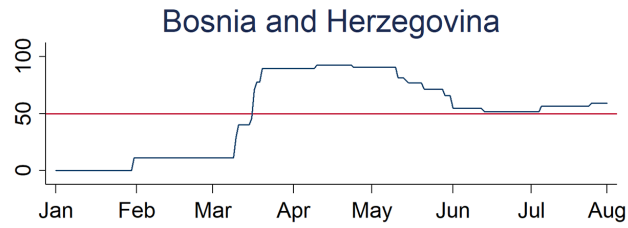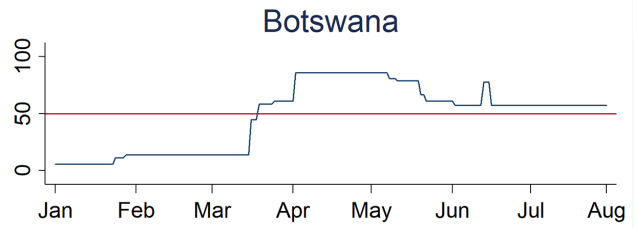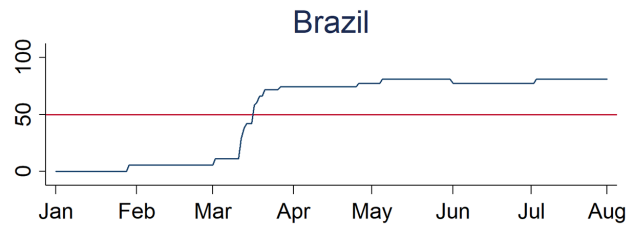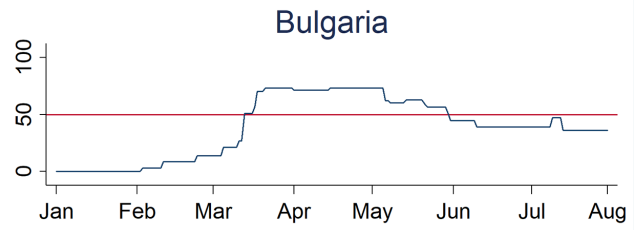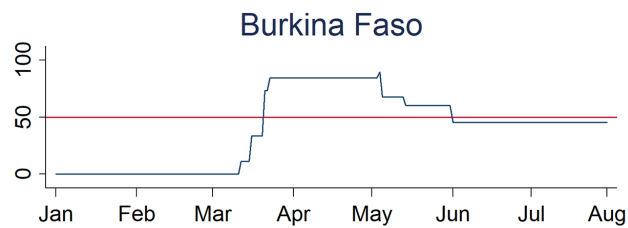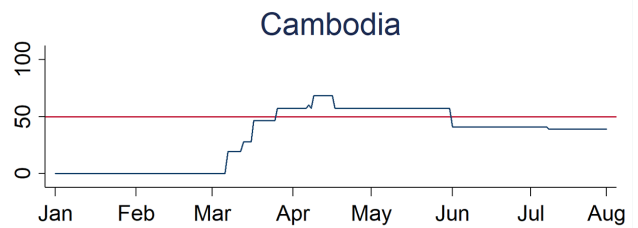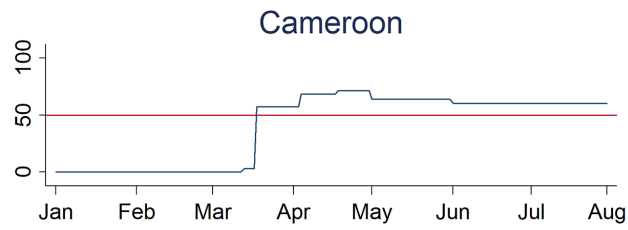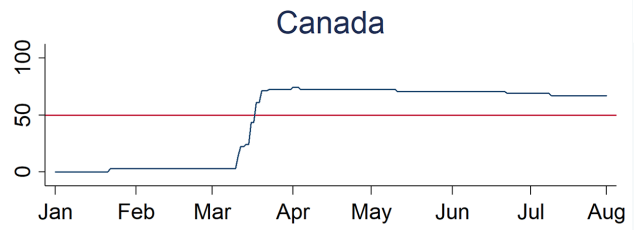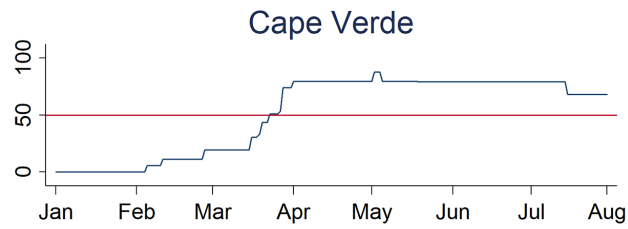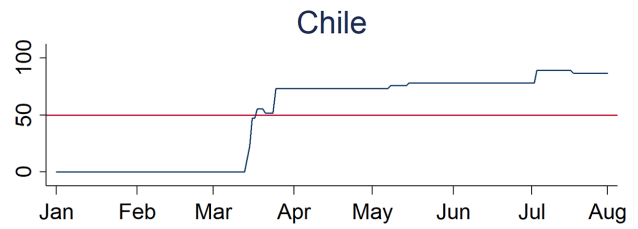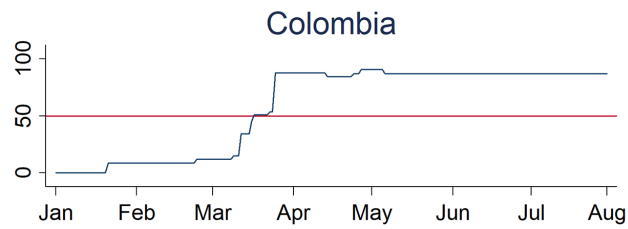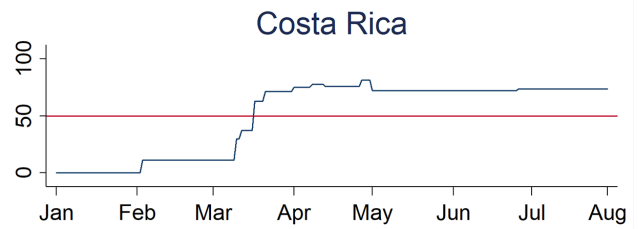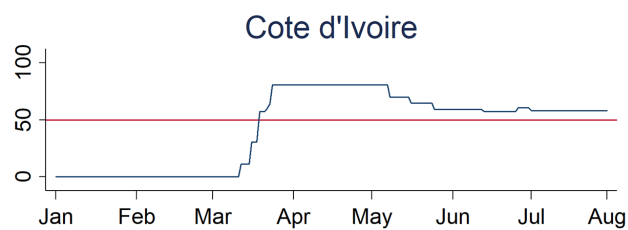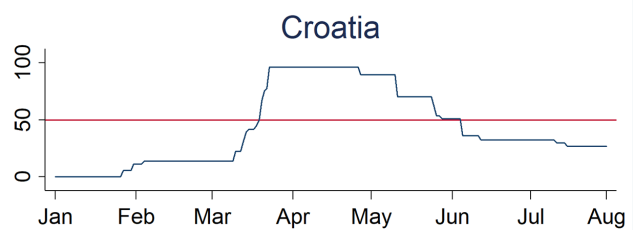

**S3 Figure:** Event graph of OxCGR T Stringency Index by country over time (cont.)

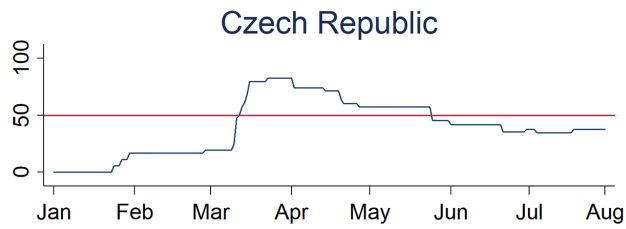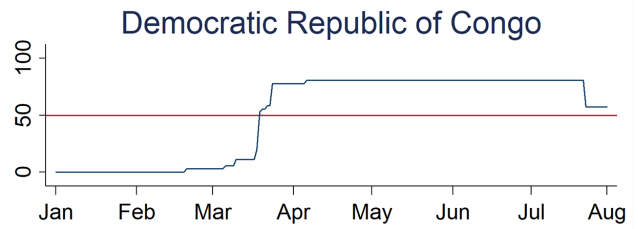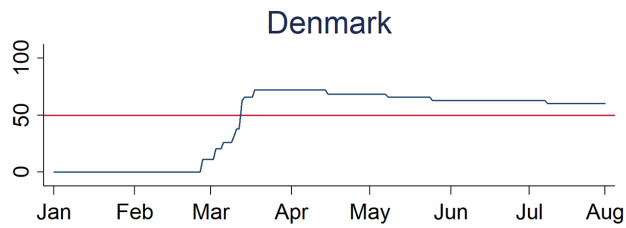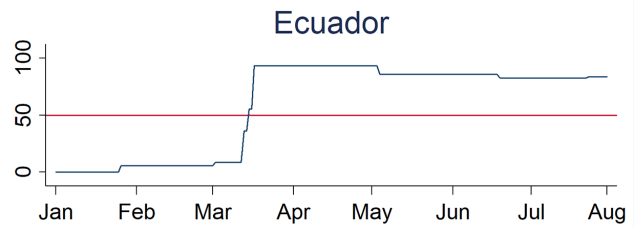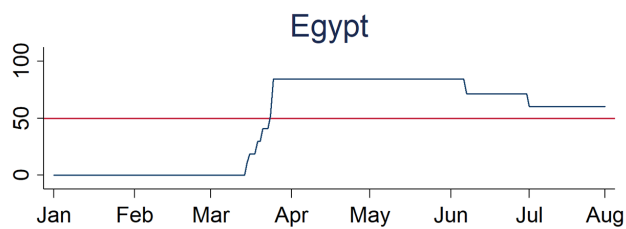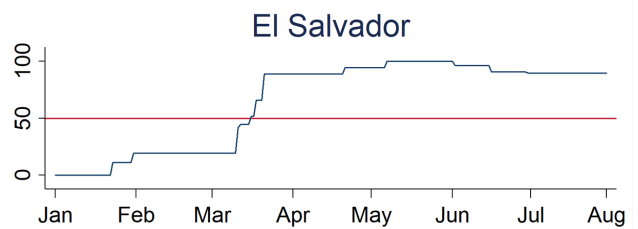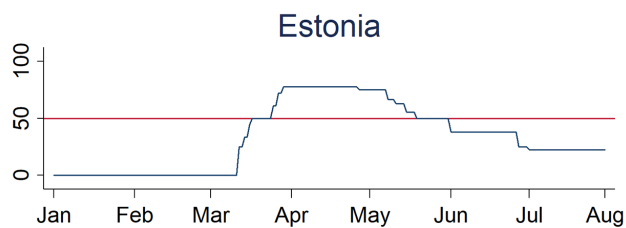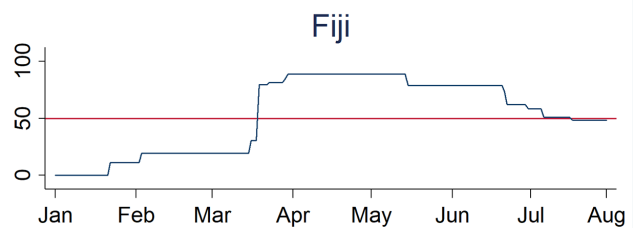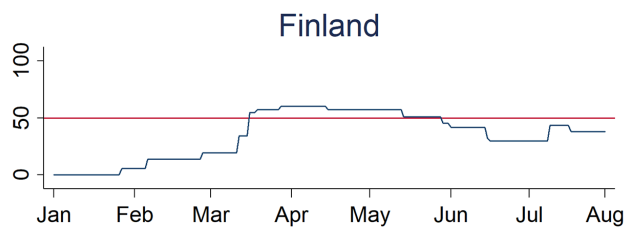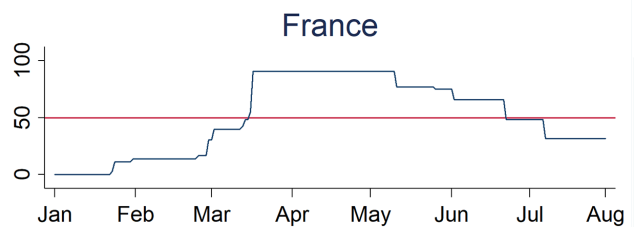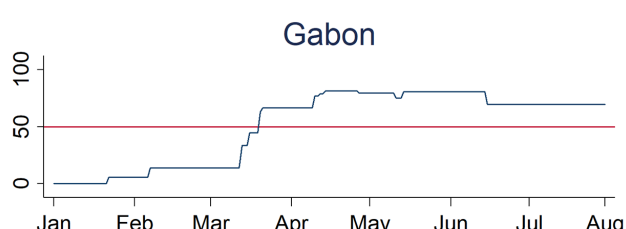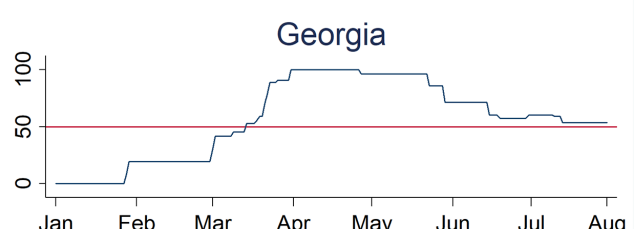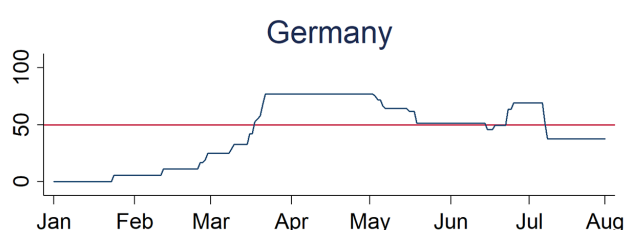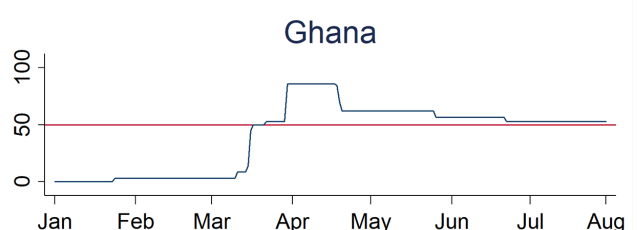

**S4 Figure:** Event graph of OxCGRT Stringency Index by country over time (cont.)

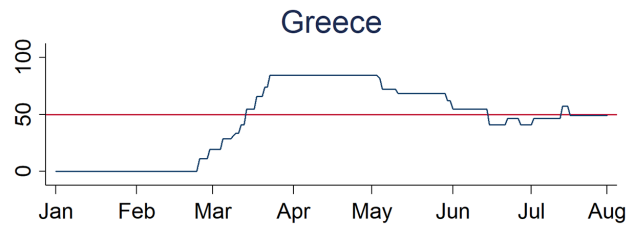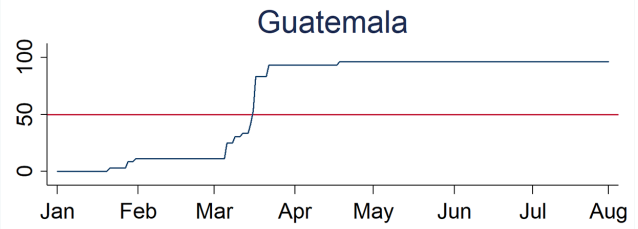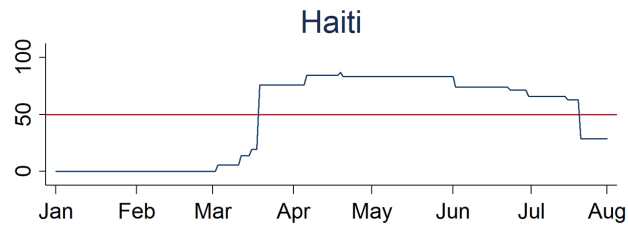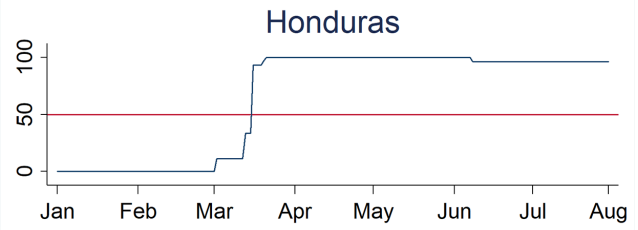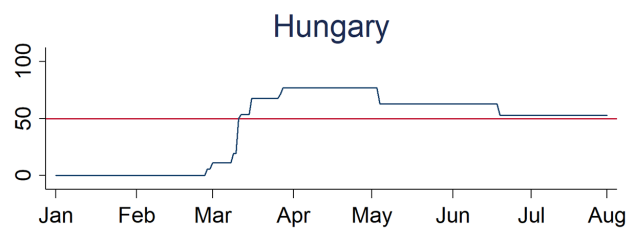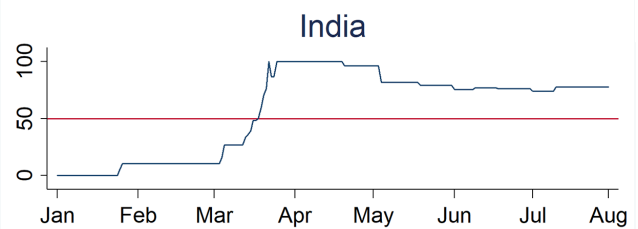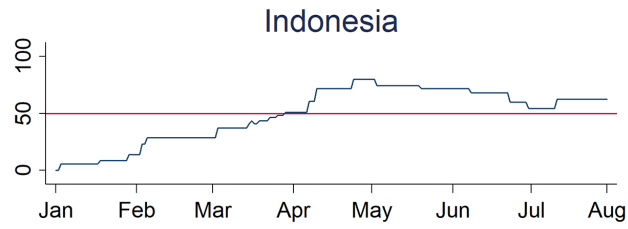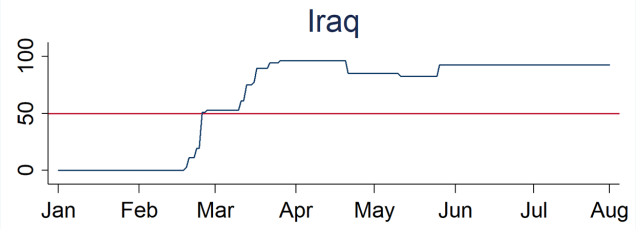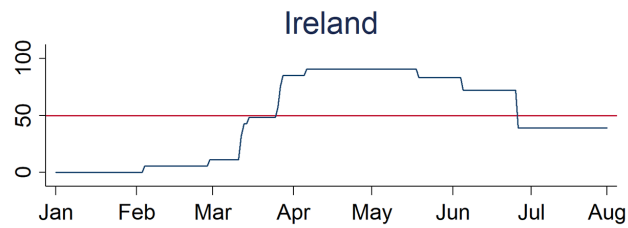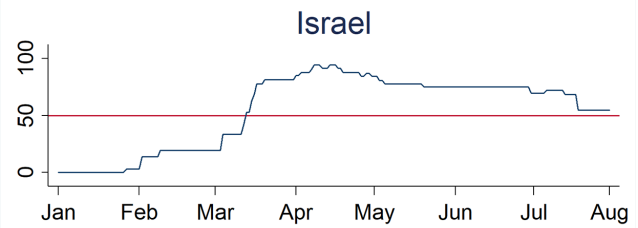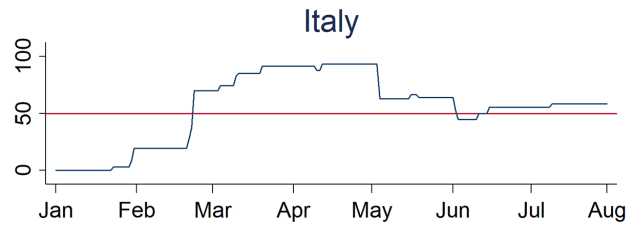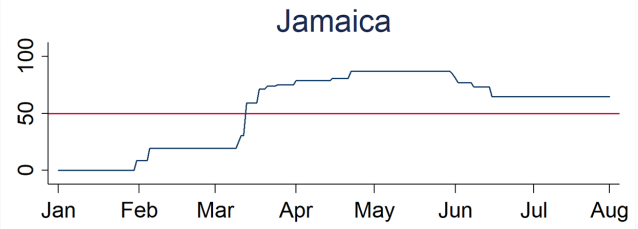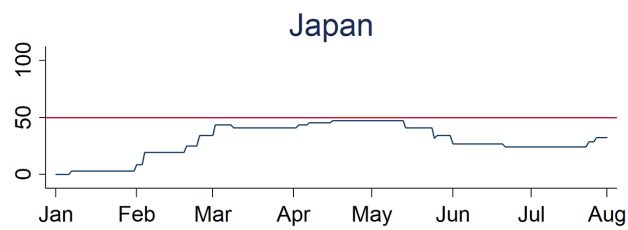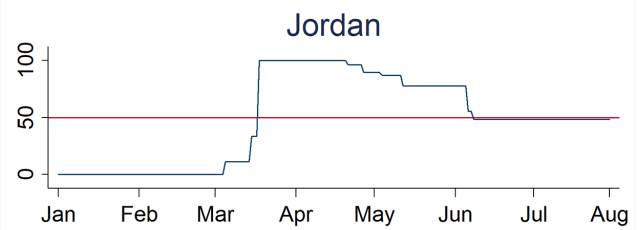

S5 Figure: Event graph of OxCGR Stringency Index by country over time (cont.)

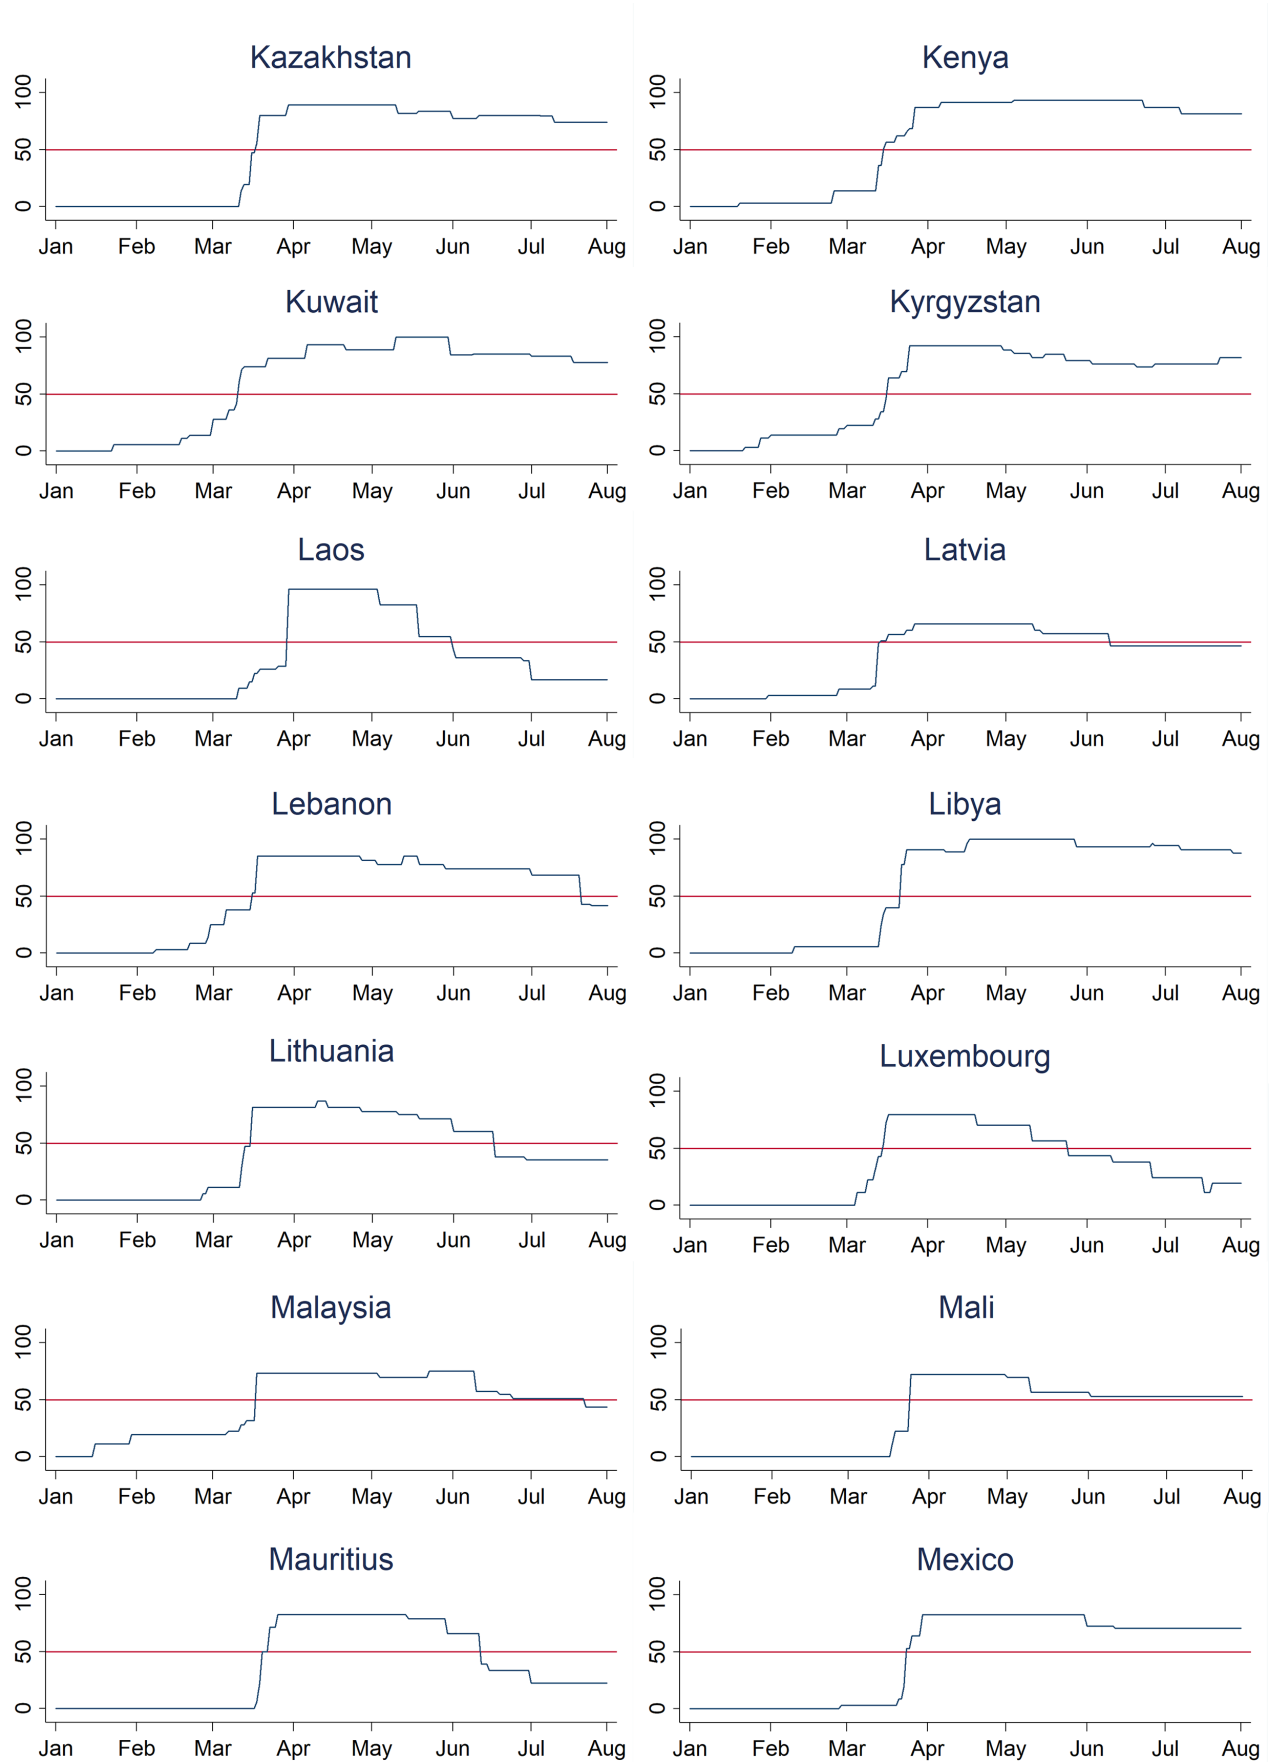

**S6 Figure:** Event graph of OxCGR T Stringency Index by country over time (cont.)

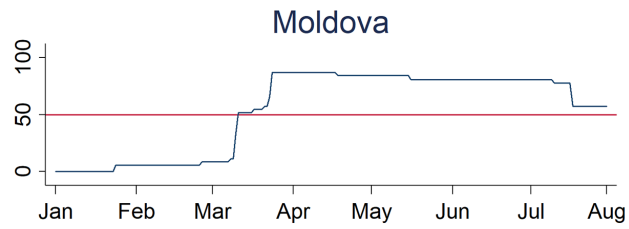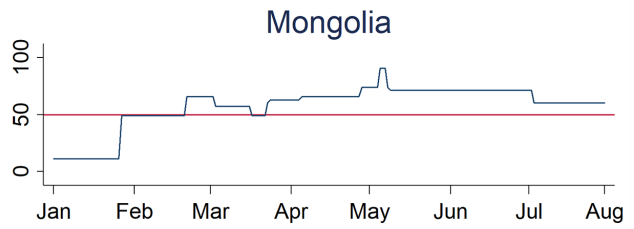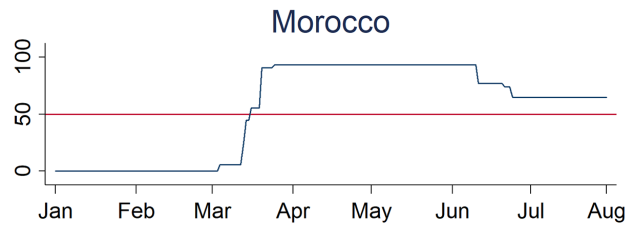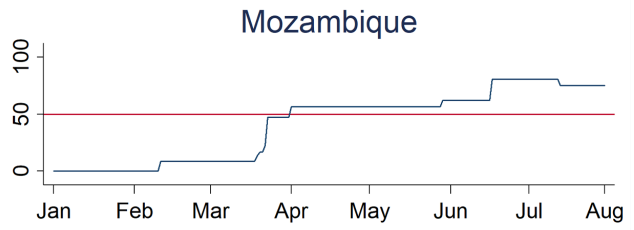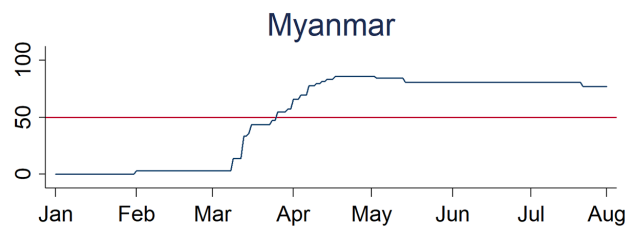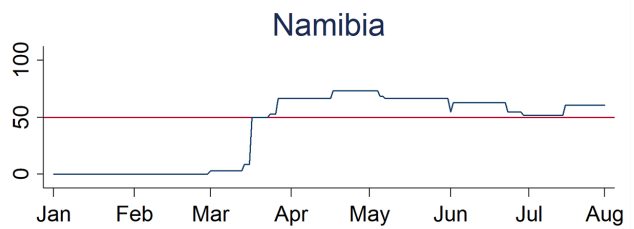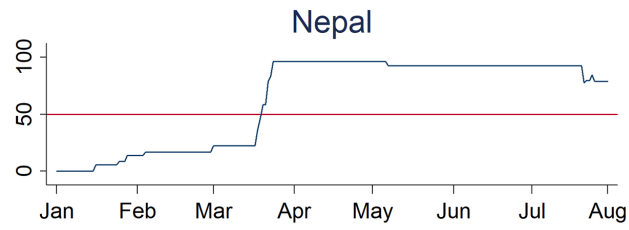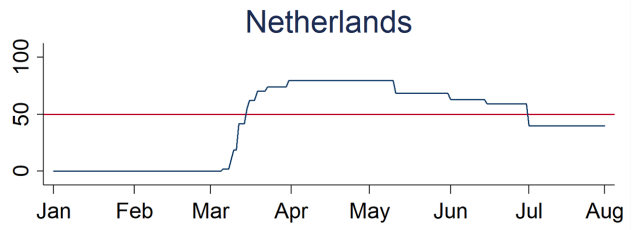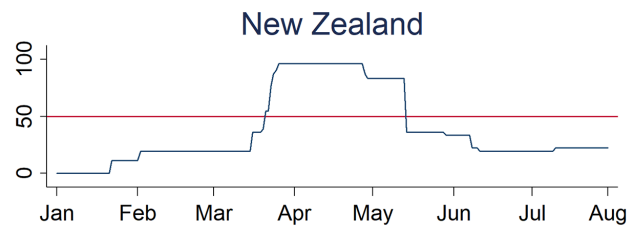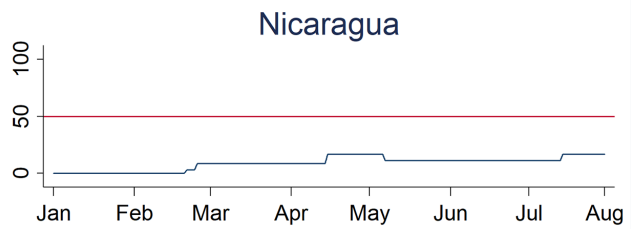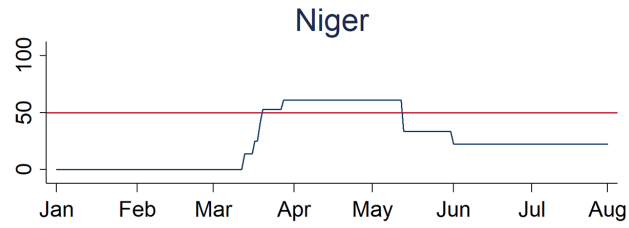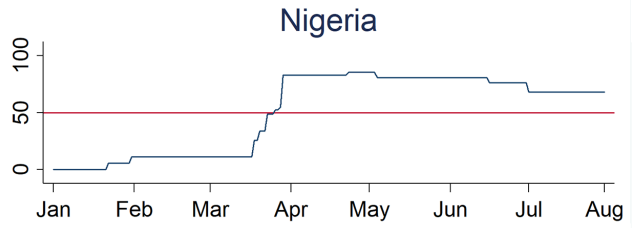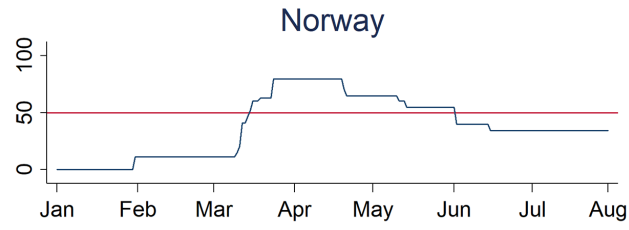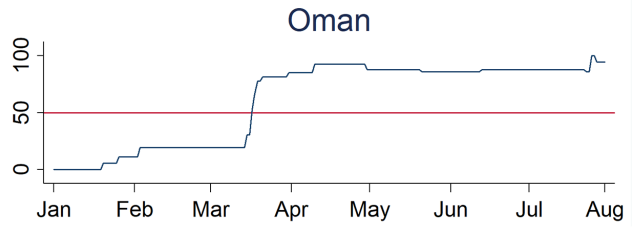

**S7 Figure:** Event graph of OxCGRT Stringency Index by country over time (cont.)

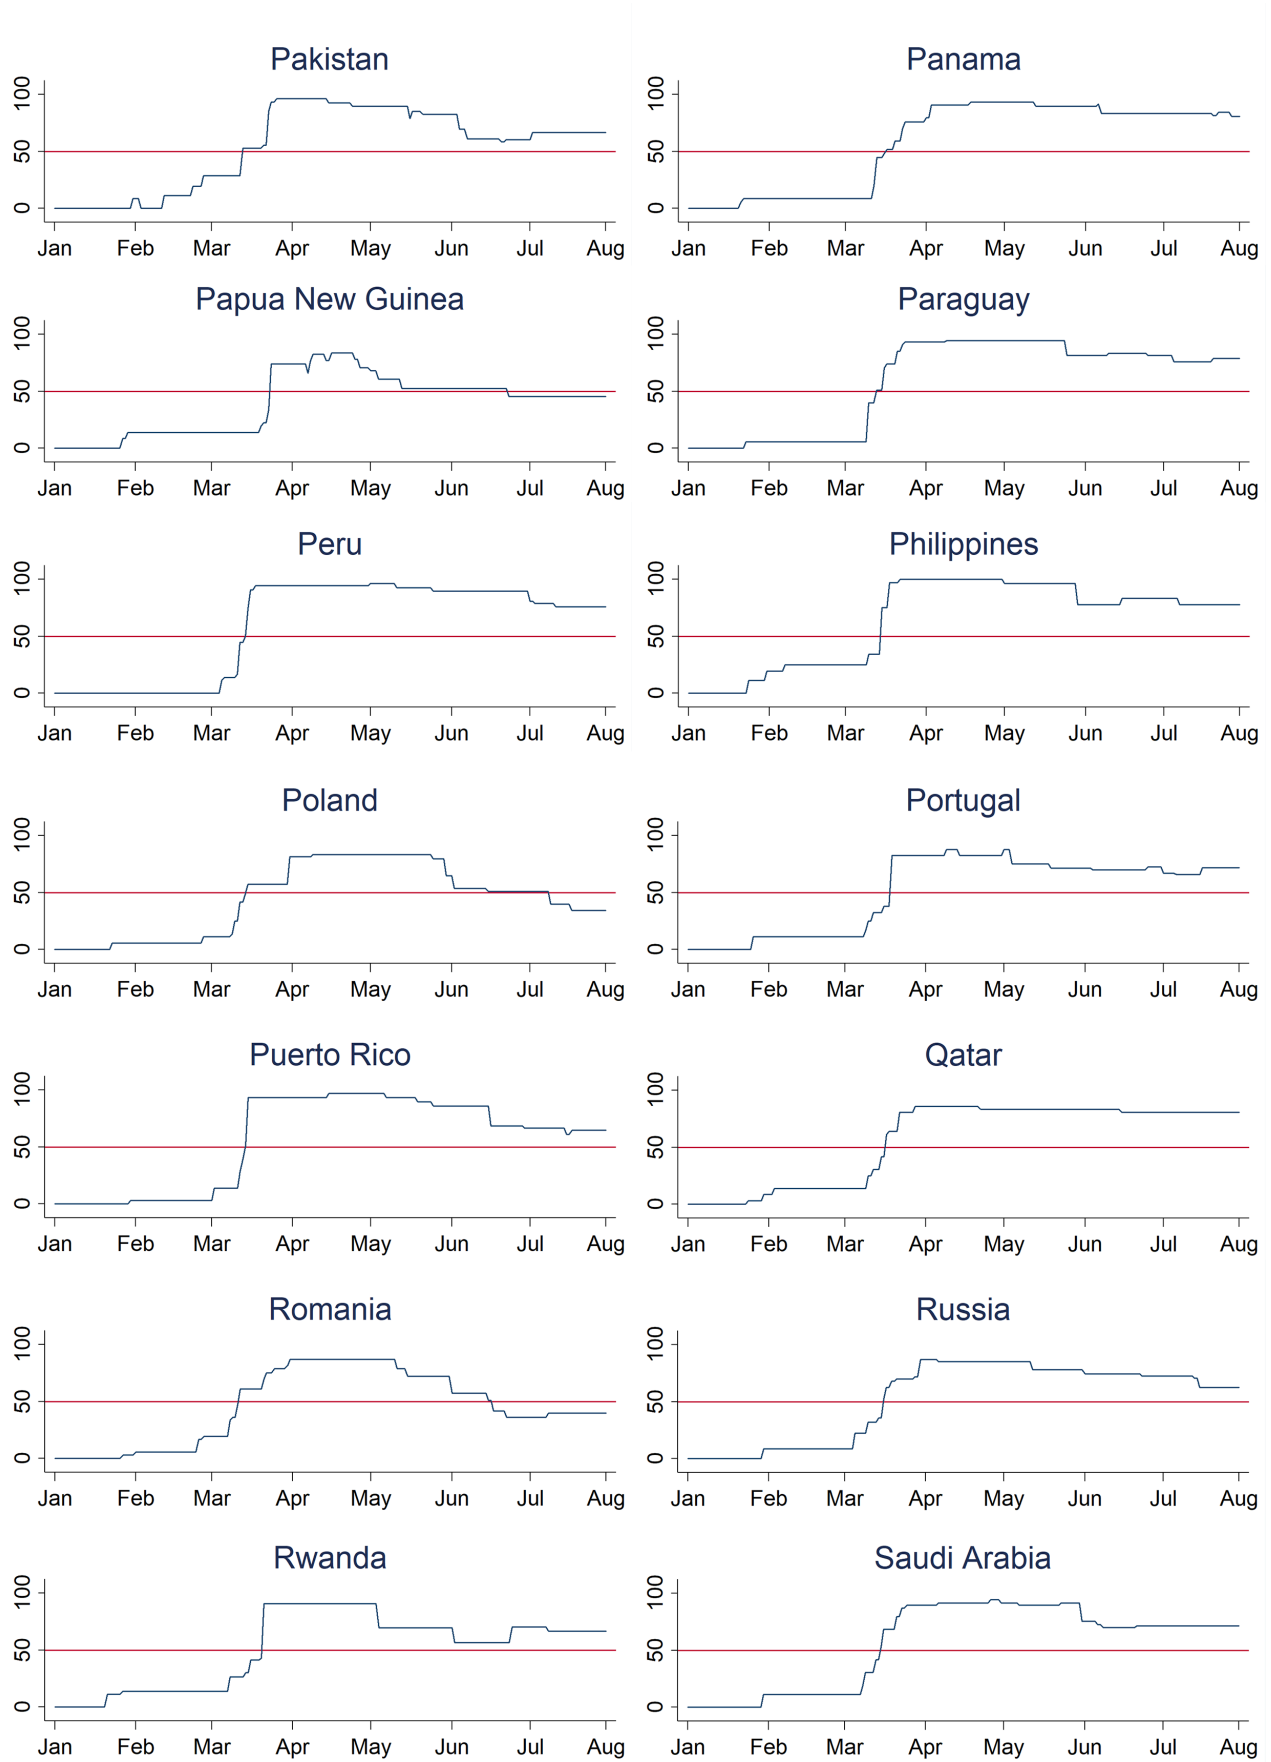



**S8 Figure:** Event graph of OxCGR T Stringency Index by country over time (cont.)

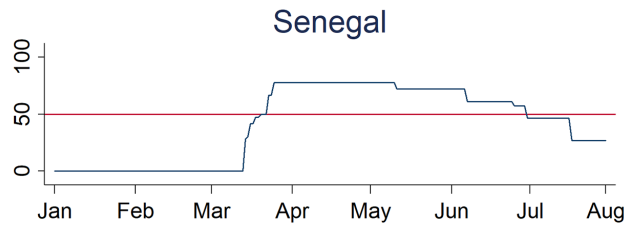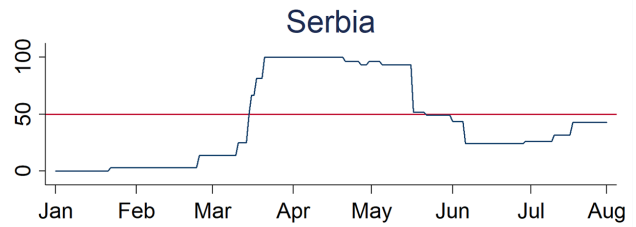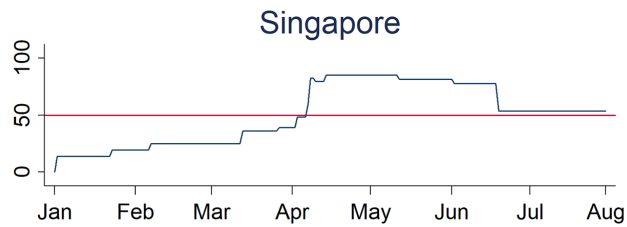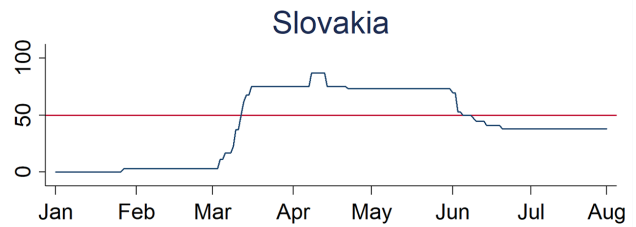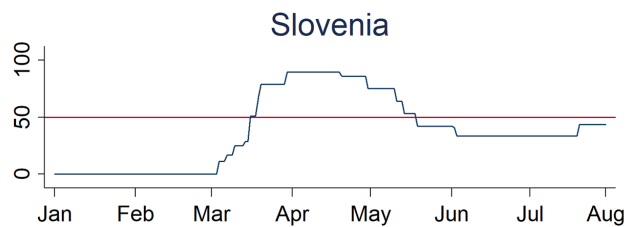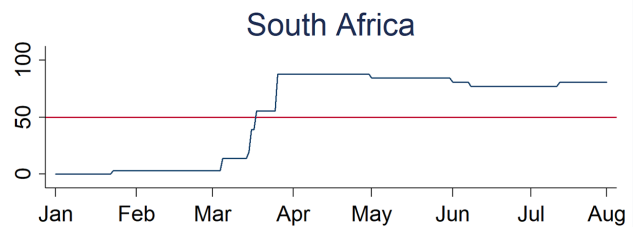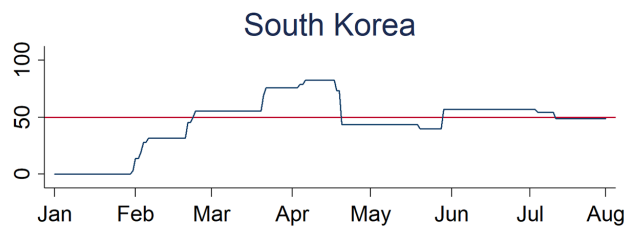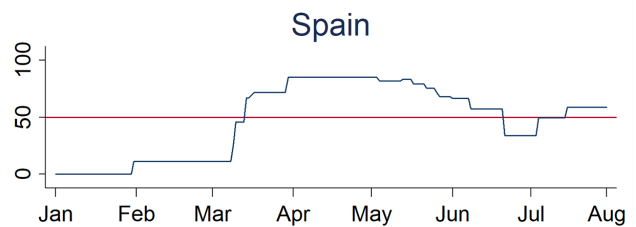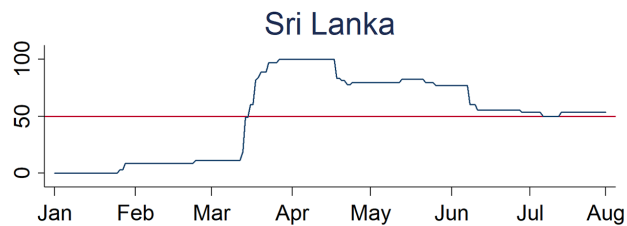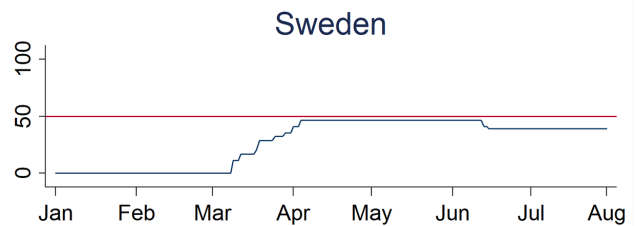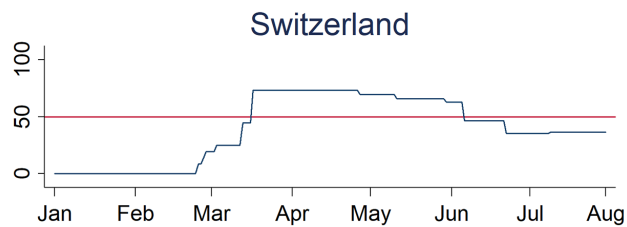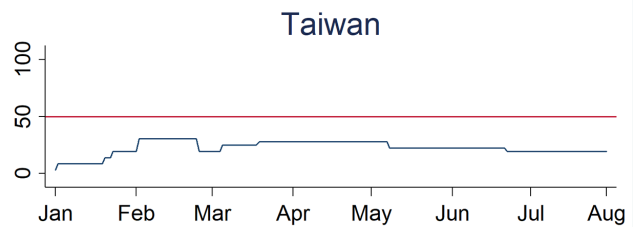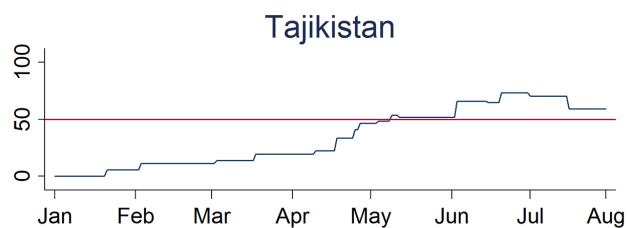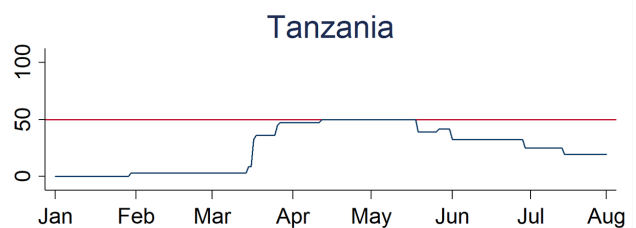

**S9 Figure:** Event graph of OxCGRT Stringency Index by country over time (cont.)

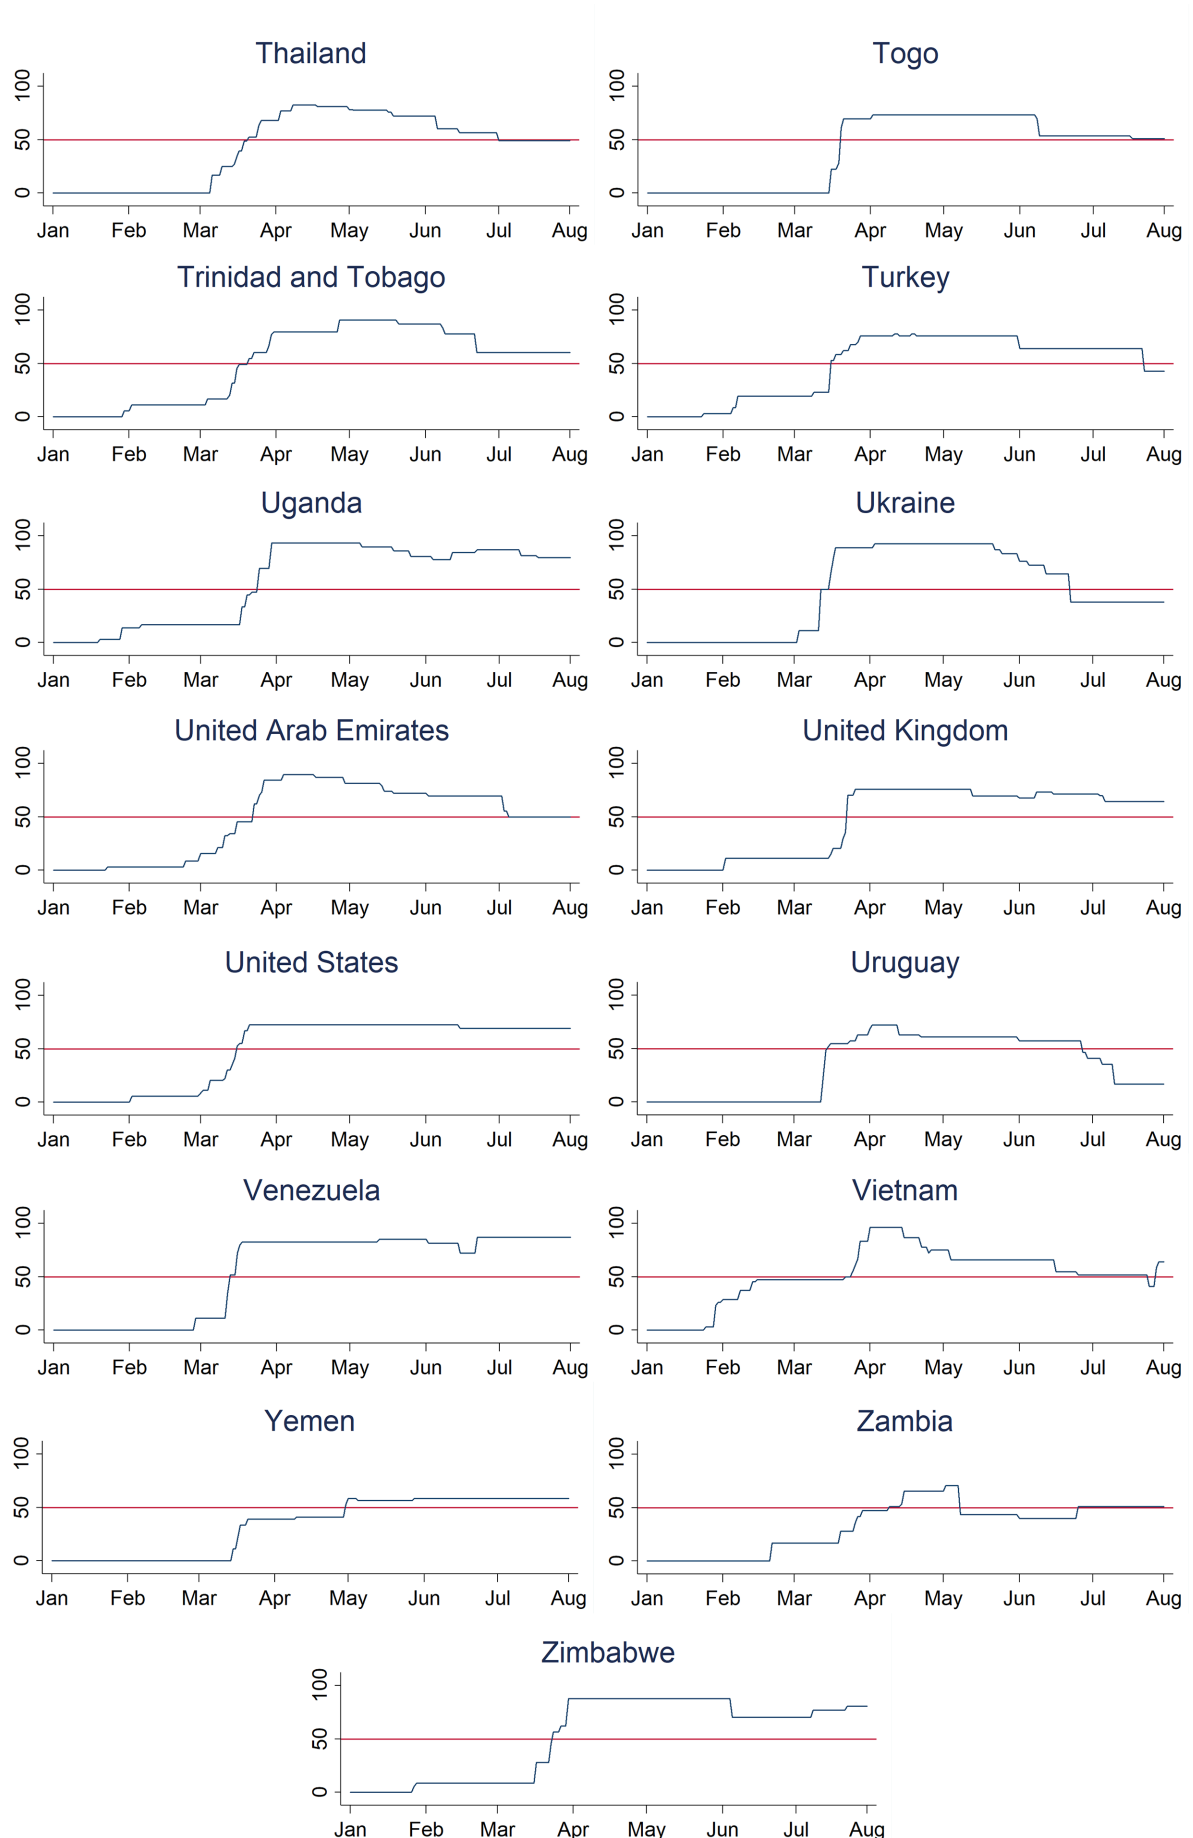

Supplement: pone.0253348.s001.pdf [file pone.0253348.s001.pdf]
